# Supplementary material
Source: publisher site journal article supplement (https://www.spandidos-publications.com/7505/downloadSupplementary)

Figure S1. Gas chromatography-mass spectrometry total ion current diagram of pine needle essential oil extracted by microwave-assisted extraction.

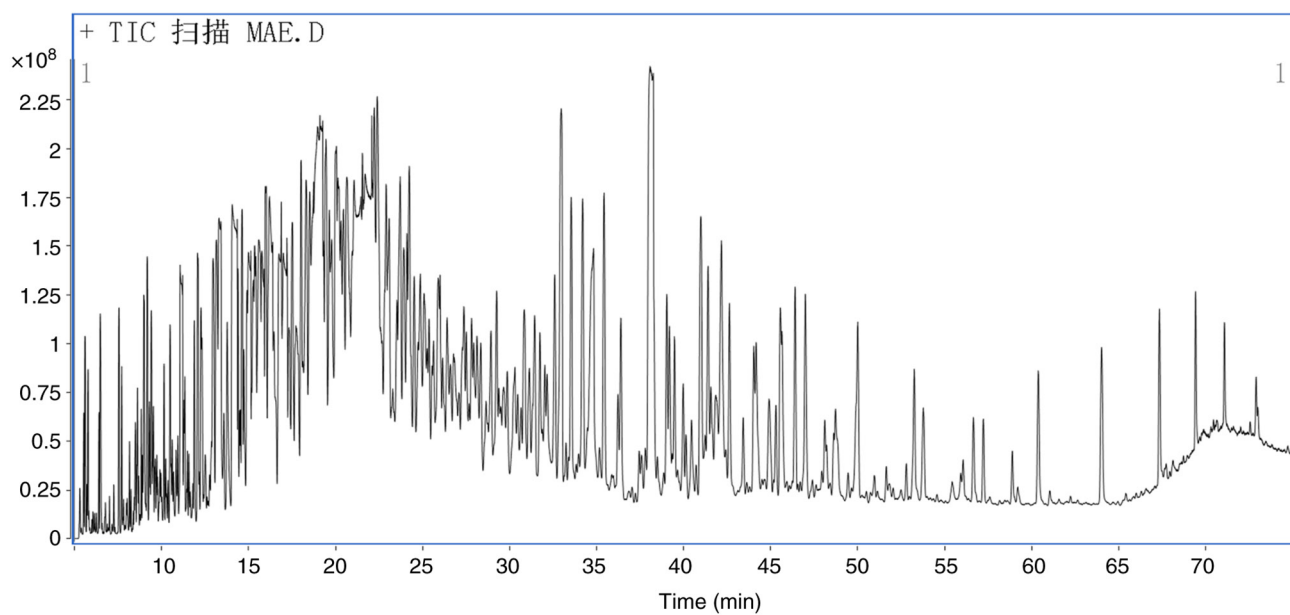

Supplement: Supplementary file 1 [file downloadSupplementary]
